# Supplementary material
Source: PubMed Central journal article supplement (PMC5364806)
Supplement: NIHMS851621-supplement-Laih_et_al_supp.pdf [file NIHMS851621-supplement-Laih_et_al_supp.pdf]

## SUPPLEMENTARY DATA

### **Relative sensitivity of immunohistochemistry, multiple reaction monitoring mass spectrometry, *in situ* hybridization and PCR to detect Coxsackievirus B1 in A549 cells**

Jutta E. Laiho<sup>1‡</sup>, Maarit Oikarinen<sup>1‡</sup>, Sarah J. Richardson<sup>2</sup>, Gun Frisk<sup>3</sup>, Julius Nyalwidhe<sup>4,5\*</sup>, Tanya C. Burch<sup>4,5,\*</sup>, Margaret A. Morris<sup>4,6,\*</sup>, Sami Oikarinen<sup>1</sup>, Alberto Pugliese<sup>7</sup>, Francesco Dotta<sup>8</sup>, Martha Campbell-Thompson<sup>9</sup>, Jerry Nadler<sup>6\*</sup>, Noel G. Morgan<sup>2</sup>, Heikki Hyöty<sup>1,10</sup> and the JDRF nPOD-Virus Group

<sup>1</sup>Department of Virology, School of Medicine, University of Tampere, Tampere Finland;

<sup>2</sup>University of Exeter Medical School, Exeter, Devon, UK; <sup>3</sup>Department of Immunology, Genetics and Pathology, Uppsala University, Uppsala, Sweden; <sup>4</sup>Microbiology and Molecular Cell Biology,

<sup>5</sup>Leroy T. Canoles Jr. Cancer Research Center, <sup>6</sup>Internal Medicine, \*Eastern Virginia Medical School, Norfolk, USA; <sup>7</sup> Diabetes Research Institute and Departments of Medicine, Microbiology and Immunology, University of Miami Miller School of Medicine, Miami, <sup>8</sup>Diabetes Unit, Dept. of Medicine Surgery and Neurosciences, University of Siena; Fondazione Umberto Di Mario ONLUS – Toscana Life Sciences, Siena, Italy, <sup>9</sup>University of Florida, Gainesville, Florida, USA; <sup>10</sup>Fimlab Laboratories, Pirkanmaa Hospital District, Tampere, Finland

### **Additional information about study design and methods**

#### Proteomics

The final MRM assay conditions used in the study were: ion spray voltage of 2800 V, curtain gas, 20 psi; Nebulizer gas 10, and interface heater temperature of 125°C. Collision energy 22.3; Dwell

time 100 msec. LC conditions, Buffer A; 0.1% formic acid/water, Buffer B; 0.1% formic acid/acetonitrile; Column, PicoFrit (75  $\mu$ M inner diameter, 2  $\mu$ M tip opening, New Objective, Woburn, MA) resin 10 cm of reverse phase 5  $\mu$ M, 100 Å Magic C18 resin (Michrom Bioresources, Auburn, CA). Flow rate, 500nl/min; gradient 5–10% Solvent B in 3 min, 10–60% solvent B in 48 min, and 60–95% solvent B for 5 min before re-equilibration with 95% solvent A for 7 min.

### Immunohistochemistry

In house antibodies against the four capsid proteins (VP1-VP4) of CVB4 virus (GenBank database – accession no. DQ480420):

The antibodies were raised in rabbits as follows: cloned recombinant VP1, VP2, VP3 and VP4 fused with His-tag (VP1-His, VP2-His, VP3-His, and VP4-His) were expressed in E.Coli, VP-His proteins were purified employing nickel columns and used for rabbit immunization. Two laboratories (Exeter and Tampere) optimized these antibodies for their IHC techniques using EV-infected cells in FFPE cell arrays. The final dilutions which were selected based on optimization are shown in Supplementary Table 1.

**Supplementary Table 1.** Concentrations of the CVB4 VP1-VP4 antibodies used in the IHC stainings in Exeter and Tampere.

| Laboratory    | VP1A   | VP1B   | VP2B   | VP3A   | VP3B   | VP4B   |
|---------------|--------|--------|--------|--------|--------|--------|
| Exeter (UK)   | 1:3000 | 1:6000 | 1:3000 | 1:2500 | 1:9000 | 1:2000 |
| Tampere (FIN) | 1:3000 | 1:4000 | 1:3200 | 1:1500 | 1:5000 | 1:2500 |

## Additional information for the Results

**Supplementary Table 2.** The RT-PCR results of different dilutions of CVB1 infected A549 cells

| <b>Sample dilutions</b>             | <b>real-time PCR<br/>Tampere (FIN)<br/>CT-value</b> | <b>semi-nested PCR<br/>Uppsala (SWE)</b> |
|-------------------------------------|-----------------------------------------------------|------------------------------------------|
| <b>Undiluted</b>                    | 13,6                                                | positive                                 |
| <b>10<sup>-1</sup></b>              | 14,3                                                | positive                                 |
| <b>10<sup>-2</sup></b>              | 16,2                                                | positive                                 |
| <b>10<sup>-3</sup></b>              | 18,9                                                | positive                                 |
| <b>10<sup>-4</sup></b>              | 23,7                                                | positive                                 |
| <b>10<sup>-5</sup></b>              | 26,2                                                | positive                                 |
| <b>10<sup>-6</sup></b>              | 30,6                                                | positive                                 |
| <b>10<sup>-7</sup></b>              | 40,6                                                | positive                                 |
| <b>10<sup>-8</sup></b>              | negative                                            | positive                                 |
| <b>Negative control<sup>1</sup></b> | negative                                            | negative                                 |

<sup>1</sup> Uninfected A549 cells treated in the same way as infected cells
